# Supplementary material for: Associations of subcutaneous fat area and Systemic Immune-inflammation Index with survival in patients with advanced gastric cancer receiving dual PD-1 and HER2 blockade
Source: PubMed Central journal article supplement — J Immunother Cancer. 2023 Jun 22;11(6):e007054. doi: 10.1136/jitc-2023-007054 (PMC10314655; doi:10.1136/jitc-2023-007054), 2023-06-22

**Table S1. Internal validation for overall survival by 1000 bootstrap resampling**

| Variables                                                | Observed HR | SE    | Bootstrap 1000<br>95% CI | <i>p</i>     |
|----------------------------------------------------------|-------------|-------|--------------------------|--------------|
| Line of therapy<br>[1]                                   | Reference   |       |                          |              |
| 2                                                        | 1.528       | 0.315 | 0.804-2.737              | 0.150        |
| 3 or more                                                | 1.640       | 0.320 | 0.865-3.114              | 0.109        |
| HER2 positive<br>[negative]                              | Reference   |       |                          |              |
| Positive                                                 | 0.465       | 0.398 | 0.209-0.996              | <b>0.030</b> |
| NA                                                       | 0.600       | 3.715 | 0.000-2.465              | 0.424        |
| SII $\geq 823 \times 10^9/L$<br>[ $<823 \times 10^9/L$ ] | 2.488       | 0.254 | 1.570-4.293              | <b>0.001</b> |
| CT-determined<br>sarcopenia                              | 1.410       | 0.274 | 0.848-2.430              | 0.174        |
| SFA high [low]                                           | 0.422       | 0.311 | 0.216-0.725              | <b>0.004</b> |

Abbreviations: HR, hazard ratio; SE, standard error; CI, confidence interval;

**Figure S1. Kaplan–Meier survival curves with log-rank tests were conducted according to sex, age, SII and PD-L1 expression between low and high SFA groups.**

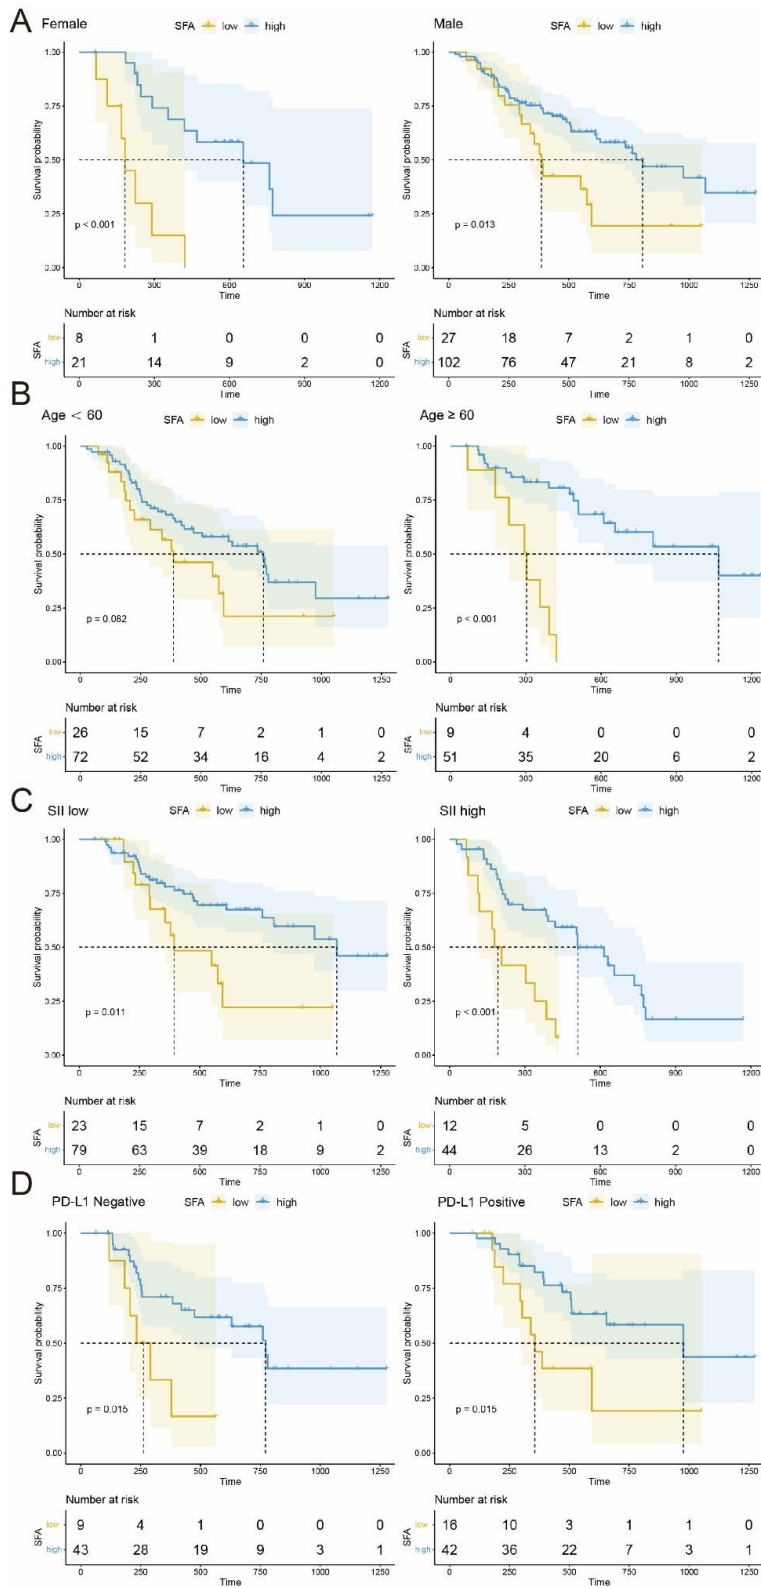

**Figure S2.** Kaplan–Meier survival curves with log-rank tests were conducted according to sex,

age, SII and PD-L1 expression between low and high SII groups.

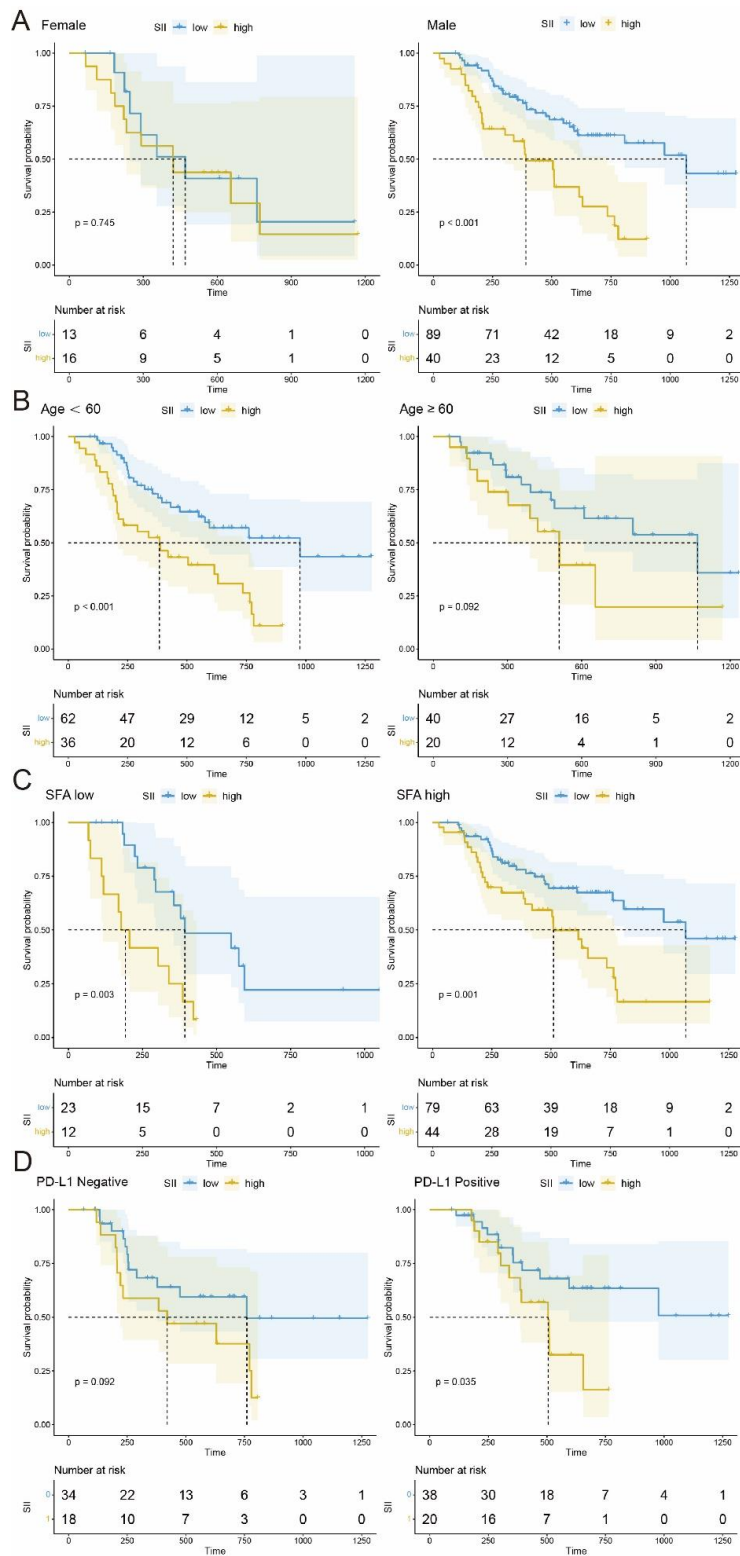

Figure S3. Clinical characteristics and body composition parameters of high and low SFA

groups.

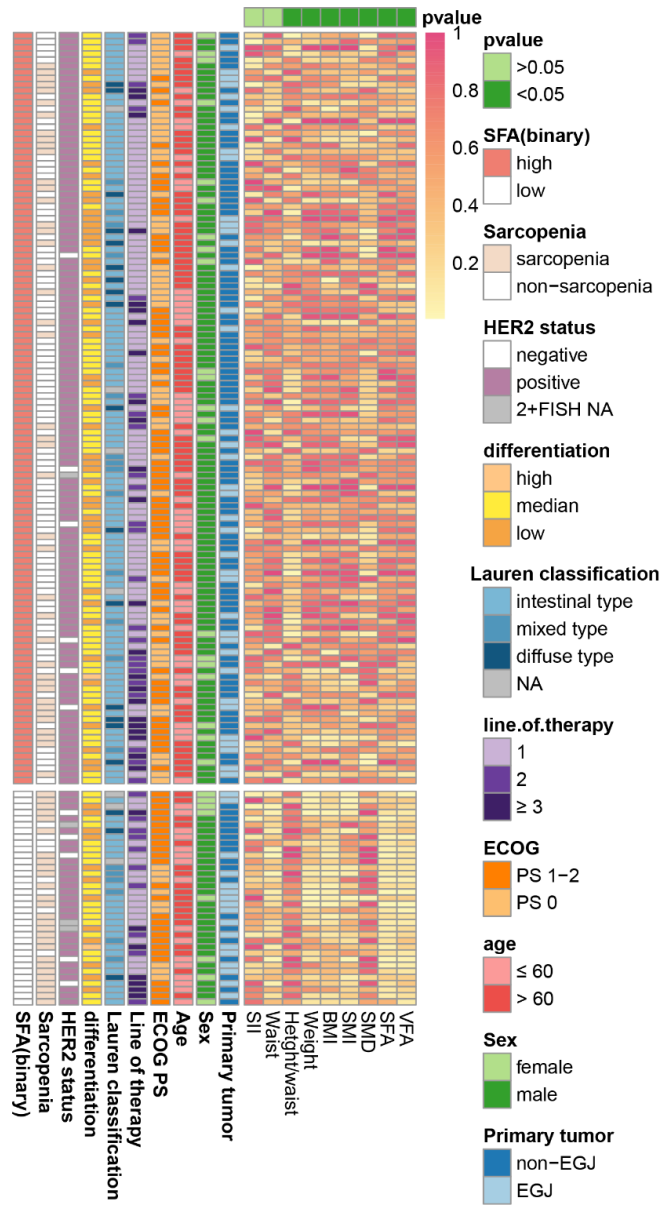

Supplement: jitc-2023-007054supp001.pdf [file jitc-2023-007054supp001.pdf]
